## Short communication

# A pilot genetic study reveals the absence of spatial genetic structure in Norway lobster (*Nephrops norvegicus*) on fishing grounds in Icelandic waters

Christophe Pampoulie<sup>1\*</sup>, Sigurlaug Skirnisdottir<sup>2</sup>, Sigurbjorg Hauksdottir<sup>2</sup>, Kristinn Olafsson<sup>3</sup>, Hrafnkell Eiríksson<sup>1</sup>, Valérie Chosson<sup>1</sup>, Gudmundur O. Hreggvidsson<sup>3</sup>, Gudmundur H. Gunnarsson<sup>4</sup>, and Sigridur Hjorleifsdottir<sup>2</sup>

<sup>1</sup>Marine Research Institute, Skúlagata 4, 101 Reykjavík, Iceland

<sup>2</sup>Matis ohf, Vínlandleið 12, 113 Reykjavík, Iceland

<sup>3</sup>Matis ohf and Faculty of Life and Environmental Science, University of Iceland, Reykjavík, Iceland

<sup>4</sup>Matis, Nyheimum, Litlu bru 2, 780 Hofn, Iceland

\*Corresponding Author: tel: +354 575 2038; fax: +354 575 2001; e-mail: [chrisp@hafro.is](mailto:chrisp@hafro.is).

Pampoulie, C., Skirnisdottir, S., Hauksdottir, S., Olafsson, K., Eiríksson, H., Chosson, V., Hreggvidsson, G. O., Gunnarsson, G. H., and Hjorleifsdottir, S. 2011. A pilot genetic study reveals the absence of spatial genetic structure in Norway lobster (*Nephrops norvegicus*) on fishing grounds in Icelandic waters. – ICES Journal of Marine Science, 68: 20–25.

Received 25 March 2010; accepted 4 October 2010; advance access publication 11 November 2010.

Stock structure of Norway lobster off southern Iceland was investigated using 12 microsatellite loci. No genetic method detected significant genetic differentiation among the locations sampled, even among Icelandic samples and an out-group from Scotland. Testing the power of resolution of microsatellite loci, the loci and sample sizes used were sufficient to detect significant genetic differentiation with confidence. The lack of genetic structure is discussed in terms of the level of gene flow, recent isolation of populations, and the statistical power of the experimental design.

**Keywords:** larval dispersal, last glacial maximum, microsatellite loci, North Atlantic Ocean, Norway lobster.

## Introduction

The identification of stock structure has been recognized widely as a prerequisite for sustainable management of marine fisheries (Reiss *et al.*, 2009), and different methods have been tested for this purpose recently (see Cadrin *et al.*, 2005, for a review). One of the currently most popular approaches is the use of highly variable genetic markers such as microsatellite loci. Although marine organisms have been thought to constitute homogenous entities, microsatellite studies have revealed the presence of subtle genetic structure at small and large geographic scales (Knutsen *et al.*, 2003; Nielsen *et al.*, 2003; Jørgensen *et al.*, 2005; D'Amato, 2006). Moreover, the recent application of microsatellite loci to stock identification has revealed a number of cases with notable discrepancy between biological and fisheries management units (Lundy *et al.*, 1999; Hoarau *et al.*, 2002; Pampoulie *et al.*, 2006; Charrier *et al.*, 2007; Was *et al.*, 2008; see Reiss *et al.*, 2009, for a review). Such results are likely to have a major effect on fisheries management. Microsatellite studies have hence been playing a more significant role in stock discrimination of marine resources and on their potential connectivity, through indirect assessment of gene flow (Viñas *et al.*, 2004; Jørgensen *et al.*, 2005; Fritsch *et al.*, 2007; Was *et al.*, 2008; Pampoulie *et al.*, 2009; Stefánsson *et al.*, 2009a).

Despite the many species studied using microsatellite loci, some important commercial species remain to be considered. This is the case for Norway lobster, *Nephrops norvegicus*, which is distributed widely in the Northeast Atlantic from Iceland to Mauritania, and in the Mediterranean Sea (Figueiredo and Thomas, 1967). Adult *N. norvegicus* are fairly sedentary, usually occupying burrows at depths of 10–1200 m and, according to tagging data, with movements rarely exceeding 100 m from their burrow (Chapman and Rice, 1971). In contrast, movements among populations can take place during the 4–8-week planktonic larval phase, i.e. through passive dispersal of larvae by oceanic currents. In Icelandic waters, Norway lobster occupy burrows at depths of 100–300 m and are exclusively in the south (Figure 1; Eiríksson, 1999). Within that area, the continental shelf is characterized by a series of straight troughs up to 250 m deep inhabited by various densities of Norway lobster at depths of 150–250 m, with the intervening banks (100–120 m) inappropriate for the species owing to the nature of bottom substrata. However, in some areas off the southwest coast, dense bank populations of Norway lobster are found at 130–180 m (Eiríksson, 1999). Populations contained within troughs and banks have been suggested to be self-contained unit stocks owing to the

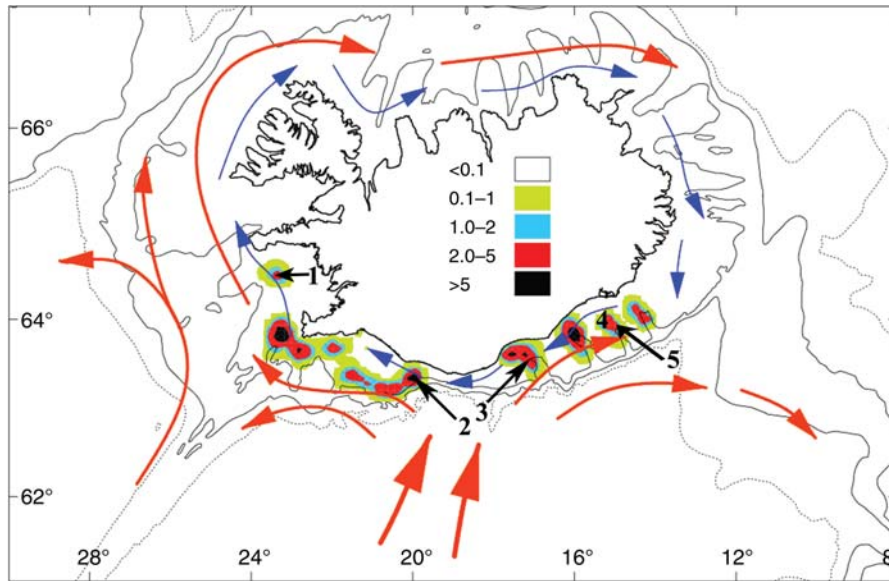

**Figure 1.** Sampling locations for Norway lobster off Iceland. The numbers refer to the samples depicted in Table 1, and fishing areas (which are also breeding areas) are indicated by colours. The scale indicates the density of catches from 2005 to 2009 ( $\text{t nautical mile}^{-2}$ ), and the arrows indicate the main currents around Iceland: red, branch of the North Atlantic Current; blue, coastal current.

characteristics of the seafloor and the biological cycle of the species (Eiríksson, 1999). Therefore, present fishing units correspond to potentially isolated areas (populations within troughs), which are also considered as breeding units.

The strong spatial variability of catch per unit effort (cpue) and mean size between isolated areas (e.g. the most eastbound vs. the most westbound; see Eiríksson, 1999) fuelled interest in testing whether population genetic approaches would reveal reproductive isolation between separate fishing units.

The Icelandic *N. norvegicus* fishery dates back to the late 1950s, with landings increasing rapidly to a historical high of 5550 t in

1963 (Figure 2). However, heavy fishing caused a decline in the catches and just 2500 t were taken in 1968, with cpue falling by 65%. Then, with improved recruitment and greater fishing effort, annual landings rose again to >4000 t in 1970–1972. As a consequence of the declining cpue (Eiríksson, 1968, 1970a, b), a total allowable catch was recommended for *N. norvegicus* by the Marine Research Institute, Reykjavík, and put into practice in 1973. In 1990, a system of individual transferable quotas was established for Icelandic fisheries. The history of the fishery from the mid-1970s to the early 2000s can be generally described by fluctuating landings, from ~2000–2500 t in the late 1970s and

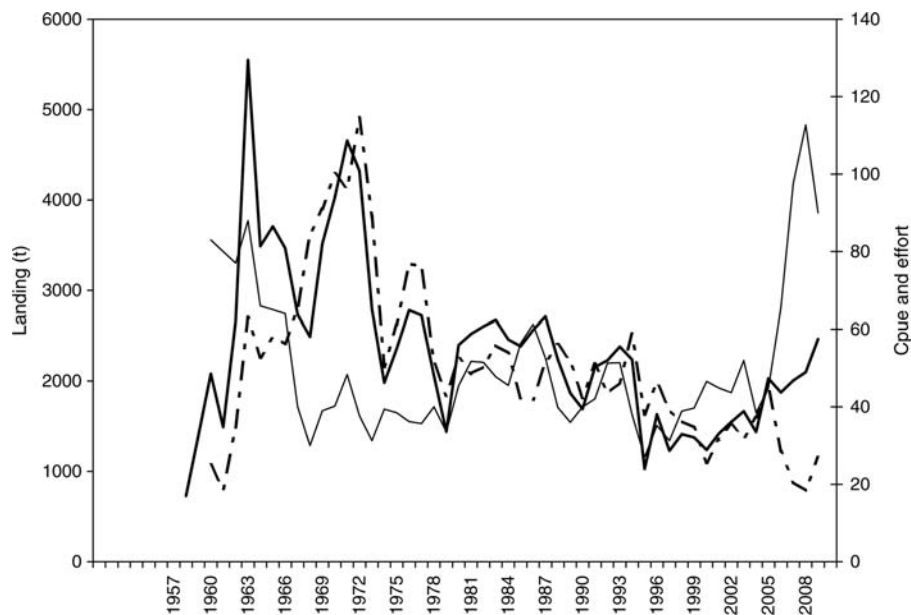

**Figure 2.** Fisheries data for Norway lobster in Icelandic waters. Bold line, landings (t); line, catch per unit effort ( $\text{kg h}^{-1}$ ); dashed–dotted line, effort ('000 h).

**Table 1.** Sampling area and information (tow number, coordinates, and depth range), sample size, sex ratio (females vs. males, F:M), and size distribution (mean carapace length in mm, standard deviation s.d., and range) for six samples of *N. norvegicus*.

| Information     | Sample 1                 | Sample 2                 | Sample 3                 | Sample 4                 | Sample 5                 | Sample 6                 |
|-----------------|--------------------------|--------------------------|--------------------------|--------------------------|--------------------------|--------------------------|
| Sampling area   | Faxaflói                 | Háfadjúp                 | Meðallands               | Breiðamerkurdjúp         | Breiðamerkurdjúp         | Scotland                 |
| Tow number      | 56                       | 32                       | 6                        | 18                       | 12                       | Not known                |
| Coordinates     | 64°24.75'N<br>23°16.91'W | 63°17.25'N<br>19°59.81'W | 63°32.95'N<br>17°40.00'W | 63°46.08'N<br>15°51.56'W | 63°40.37'N<br>15°48.36'W | 55°44.89'N<br>04°59.37'W |
| Depth range (m) | 156–166                  | 219–238                  | 141–143                  | 199–210                  | 193–196                  | Not known                |
| Sample size     | 185                      | 92                       | 75                       | 97                       | 100                      | 94                       |
| F:M             | 4:181                    | 7:85                     | 0:75                     | 3:94                     | 0:100                    | 15:30 <sup>a</sup>       |
| Length (mm)     |                          |                          |                          |                          |                          |                          |
| Mean            | 54.15                    | 41.14                    | 57.62                    | 45.96                    | 49.13                    | 36.35                    |
| s.d.            | 8.75                     | 8.20                     | 7.87                     | 7.60                     | 7.08                     | 5.56                     |
| Range           | 32–73                    | 23–62                    | 36–80                    | 29–64                    | 28–73                    | 25–51                    |

<sup>a</sup>The sex ratio was based on 45 animals.

the 1980s, with cpue increasing in the 1980s and the early 1990s, and a decline to 1500 t or less by the mid-1990s accompanied by a historically low cpue, associated with a record low recruitment to the fishable stock. However, recruitment and landings have increased gradually in recent years, accompanied by a notable decrease in effort and a historically high cpue of 90–110 kg h<sup>-1</sup> from 2007 to 2009 (Figure 2).

The aims of the present study were to provide preliminary information on the possible genetic structure of *N. norvegicus* in Icelandic waters, to assess whether actual fishing units correspond to genetically distinct populations, and to assess whether or not the variability in cpue and mean size between isolated areas could be explained by reproductive isolation of the fishing units.

## Material and methods

### Sampling areas and protocol

In all, 549 Norway lobster were collected at several locations in an annual *Nephrops* survey in Icelandic waters in May 2007 (Figure 1). The research vessel was rigged with a conventional *Nephrops* trawl of 45 m headline and mesh size 80 mm. An additional sample of 94 animals collected at North Clyde, west of the Isle of Cumbrae, Scotland, was analysed genetically as an out-group.

Genetic samples were collected from tails preserved in 99% ethanol. Samples were genotyped at 12 microsatellite loci, namely B11, C12, E4, and G2 (Streiff *et al.*, 2001) and PLH4, PLH5, PLH12, PLH15, PLH21, PLH33, PLH35, and PLH46 (Skirnisdottir *et al.*, 2010). DNA extraction, PCR, and genotyping were performed as described in Skirnisdottir *et al.* (2010). The Streiff *et al.* (2001) loci were amplified with annealing temperatures 58°C (for G2) and 60°C (for B11, C12, and E4), and the PCR conditions were as described in Skirnisdottir *et al.* (2010).

### Genetic analyses

Genetic diversity was evaluated using allele frequencies, observed ( $H_o$ ) and unbiased expected heterozygosity ( $H_e$ ) calculated in GENEPOP'007 (Rousset, 2008). Deviations from the Hardy–Weinberg expectation (HWE) were tested using the inbreeding coefficient  $F_{IS}$  (Weir and Cockerham, 1984) implemented in GENEPOP, and significance was assessed with exact tests. Genetic differentiation was estimated using theta estimates ( $\theta$ ; Weir and Cockerham, 1984) implemented in GENEPOP, and significance was assessed with allelic and genotypic frequency

homogeneity tests (5000 permutations). The significance levels were adjusted by a simple Bonferroni correction (Rice, 1989) when multiple tests were applied.

The statistical power of the microsatellite loci was estimated using the program POWSIM (Ryman and Palm, 2006), which assesses the  $\alpha$  (type I) error (the probability of rejecting  $H_o$  when it is true) and the  $\beta$  (type II) error, which is the probability of rejecting ( $H_o$ : genetic homogeneity) when it is false. The program estimates the power of the genetic design performed using information on sample size, number of samples, number of loci, and allele frequencies for any hypothetical degree of true differentiation quantified as  $F_{ST}$  (Ryman and Palm, 2006). The significance of the tests is assessed with Fisher's exact tests as well as with  $\chi^2$  tests.

STRUCTURE 2.3.2 (Pritchard *et al.*, 2000) was used to enumerate the potential number of populations within our samples. Owing to the very low genetic differentiation level detected, we used the admixture model with the LOCPRIOR setting, which considers location information. This recently developed method (Hubisz *et al.*, 2009) has been suggested to perform better than the traditional STRUCTURE methods when genetic structure is weak or when the number of loci is low (<20). The model was run with a burn-in period of 300 000 iterations and 600 000 Markov chain Monte Carlo iterations. The potential number of populations ( $K$ ) varied from 1 to 15 and was tested with five independent analyses for each  $K$ .

## Results

Biological information retrieved from the samples is listed in Table 1. Genetic diversity assessed as the number of alleles per locus was high, ranging from 8 (C12) to 53 (PLH33; data not shown). The value of  $H_e$  per sample ranged from 0.821 (Sample 4) to 0.859 (Sample 2; Table 2). Genotypic proportions were out of HWE in 2 of 96 exact tests after the Bonferroni correction for multiple tests and were not attributable to any specific loci or samples. Only Sample 4 deviated from HWE (Table 2). The overall genetic estimates did not reveal significant  $F_{ST}$  ( $F_{ST} = -0.0003$ ,  $p > 0.05$ , 95% CI:  $-0.0009$ – $0.0002$ ) or  $F_{IS}$  values ( $F_{IS} = 0.0232$ ,  $p > 0.05$ , 95% CI:  $0.0092$ – $0.0360$ ). This genetic pattern was reflected in the pairwise  $F_{ST}$  comparisons of samples, because none of the comparisons were significant after the Bonferroni correction (Table 3).

The estimate of the statistical  $\alpha$  (type I) error, e.g. the probability of rejecting the null hypothesis ( $H_o$ ; genetic homogeneity)

**Table 2.** Expected heterozygosity ( $H_e$ ) and deviation from HWE ( $F_{IS}$ ) for 12 microsatellite loci in six samples of *N. norvegicus*.

| Locus        | Sample 1 |              | Sample 2 |              | Sample 3 |              | Sample 4 |                          | Sample 5 |                          | Sample 6 |              |
|--------------|----------|--------------|----------|--------------|----------|--------------|----------|--------------------------|----------|--------------------------|----------|--------------|
|              | $H_e$    | $F_{IS}$     | $H_e$    | $F_{IS}$     | $H_e$    | $F_{IS}$     | $H_e$    | $F_{IS}$                 | $H_e$    | $F_{IS}$                 | $H_e$    | $F_{IS}$     |
| B11          | 0.822    | 0.032        | 0.841    | 0.043        | 0.847    | 0.027        | 0.833    | −0.014                   | 0.835    | 0.030                    | 0.837    | −0.002       |
| C12          | 0.464    | 0.081        | 0.507    | 0.035        | 0.542    | −0.008       | 0.481    | <b>0.185</b>             | 0.442    | 0.028                    | 0.459    | −0.005       |
| E4           | 0.876    | 0.038        | 0.887    | −0.030       | 0.882    | 0.002        | 0.877    | <b>0.094</b>             | 0.895    | 0.040                    | 0.876    | 0.065        |
| G2           | 0.966    | −0.007       | 0.971    | 0.037        | 0.971    | 0.011        | 0.966    | 0.040                    | 0.969    | 0.019                    | 0.968    | <b>0.099</b> |
| PLH4         | 0.797    | 0.019        | 0.787    | −0.008       | 0.767    | 0.062        | 0.772    | 0.052                    | 0.766    | −0.045                   | 0.772    | 0.022        |
| PLH5         | 0.845    | 0.010        | 0.818    | −0.037       | 0.857    | −0.011       | 0.821    | −0.093                   | 0.829    | −0.001                   | 0.866    | −0.016       |
| PLH12        | 0.842    | 0.076        | 0.847    | 0.014        | 0.824    | 0.013        | 0.836    | 0.018                    | 0.826    | 0.022                    | 0.836    | −0.047       |
| PLH15        | 0.943    | −0.014       | 0.948    | −0.020       | 0.940    | −0.021       | 0.939    | −0.011                   | 0.944    | −0.015                   | 0.949    | 0.003        |
| PLH31        | 0.875    | 0.068        | 0.886    | 0.033        | 0.867    | 0.018        | 0.868    | 0.054                    | 0.873    | 0.017                    | 0.895    | −0.054       |
| PLH33        | 0.963    | 0.029        | 0.958    | 0.051        | 0.957    | <b>0.096</b> | 0.959    | <b>0.164<sup>a</sup></b> | 0.963    | 0.036                    | 0.954    | <b>0.076</b> |
| PLH35        | 0.964    | 0.010        | 0.966    | <b>0.083</b> | 0.969    | 0.027        | 0.967    | 0.021                    | 0.964    | <b>0.098<sup>a</sup></b> | 0.959    | 0.025        |
| PLH46        | 0.942    | −0.019       | 0.951    | 0.031        | 0.938    | −0.008       | 0.949    | 0.001                    | 0.946    | 0.031                    | 0.928    | −0.017       |
| Overall loci | 0.856    | <b>0.024</b> | 0.859    | <b>0.020</b> | 0.858    | 0.018        | 0.851    | <b>0.038<sup>a</sup></b> | 0.850    | <b>0.023</b>             | 0.854    | 0.014        |

Emboldened values differ significantly from zero (Fisher's exact test,  $p < 0.05$ ).

<sup>a</sup>Values remaining significant after Bonferroni correction ( $\alpha = 0.05/72 = 0.00069$ ).

**Table 3.** Pairwise  $F_{ST}$  (above diagonal) and values of  $p$  (below diagonal) among six samples of *N. norvegicus* based on allelic frequencies.

|   | 1            | 2            | 3            | 4      | 5            | 6     |
|---|--------------|--------------|--------------|--------|--------------|-------|
| 1 |              | 0.000        | −0.001       | −0.001 | 0.000        | 0.001 |
| 2 | 0.156        |              | 0.001        | −0.002 | 0.000        | 0.001 |
| 3 | 0.308        | 0.085        |              | 0.001  | 0.000        | 0.001 |
| 4 | 0.405        | 0.228        | <b>0.032</b> |        | −0.001       | 0.001 |
| 5 | 0.437        | 0.442        | 0.507        | 0.668  |              | 0.001 |
| 6 | <b>0.011</b> | <b>0.011</b> | <b>0.048</b> | 0.139  | <b>0.016</b> |       |

Emboldened values differ significantly from zero (Fisher's exact test,  $p < 0.05$ ), none remained significant after Bonferroni correction ( $\alpha = 0.05/15 = 0.003$ ).

**Table 4.** Estimate of the resolution power of the microsatellite loci using POWSIM (Ryman and Palm, 2006).

| Expected $F_{ST}$ | Average $F_{ST}$ | $\chi^2$ -test | Fisher's test | $N_e$ | Generation (t) | Runs   |
|-------------------|------------------|----------------|---------------|-------|----------------|--------|
| 0.0000            | 0.0000           | 0.097          | 0.068         | 1 000 | 0              | 10 000 |
| 0.0001            | 0.0001           | 0.996          | 0.997         | 1 000 | 2              | 10 000 |
| 0.0010            | 0.0010           | 0.997          | 0.998         | 2 000 | 4              | 10 000 |
| 0.0020            | 0.0020           | 1.000          | 1.000         | 1 000 | 4              | 10 000 |
| 0.0100            | 0.0100           | 1.000          | 1.000         | 1 000 | 20             | 10 000 |
| 0.0198            | 0.0198           | 1.000          | 1.000         | 1 000 | 40             | 10 000 |

Resolution power is assessed by simulating different expected level of  $F_{ST}$  according to the effective population size ( $N_e$ ) and generations ( $t$ ) and to the Nei (1987) formula  $F_{ST} = 1 - (1 - 1/2N_e)^t$ . The significance, evaluated using Fisher's exact tests and  $\chi^2$  tests, reflects the power to detect any given level of differentiation (average  $F_{ST}$ ) with the sampling design developed during our study. Values of  $N_e$  used during the test are based on estimates calculated from fisheries data. The column headed "Runs" denotes the number of simulations performed. The setting  $F_{ST} = 0$  and  $t = 0$  estimates  $\alpha$  (type I error, in the absence of genetic drift).

when it is true varied from 0.068 with Fisher's exact tests to 0.097 with  $\chi^2$  tests (Table 4), much higher than the 5% limit for significance. Moreover, simulation analyses on the power analysis of the microsatellite loci revealed that the combination of microsatellite loci and sample sizes used conferred a statistical power sufficient to detect a very low ( $F_{ST} = 0.0001$ ) level of differentiation (Table 4).

The Bayesian cluster analysis (using location information) confirmed the observed pattern with the pairwise  $F_{ST}$  comparisons and showed that the most likely number of  $K$  was 1 (mean  $\ln P(D) \pm$  s.d.:  $K = 1$ ,  $-41\,348 \pm 196$ ;  $K = 2$ ,  $-41\,812 \pm 1968$ ;  $K = 3$ ,  $-42\,096 \pm 3689$ ;  $K = 4$ ,  $-41\,518 \pm 3377$ ;  $K = 5$ ,  $-41\,400 \pm 3654$ ;  $K = 6$ ,  $-42\,636 \pm 4283$ ;  $K = 7$ ,  $-41\,436 \pm 4589$ ;  $K = 8$ ,  $-41\,789 \pm 5924$ ;  $K = 9$ ,  $-42\,062 \pm 6321$ ;  $K = 10$ ,  $-41\,344 \pm 6745$ ;  $K = 15$ ,  $-42\,459 \pm 9130$ ).

## Discussion

Genetic markers have been used extensively to assess the stock structure of commercial species, yet several species remain to be investigated, including Norway lobster. This study aimed to assess the genetic structure of this species in Icelandic waters using microsatellite loci. The results of this pilot study revealed that *N. norvegicus* do not exhibit any significant genetic differentiation around Iceland, results supported by a non-significant overall  $F_{ST}$ , non-significant pairwise  $F_{ST}$  comparisons among samples collected, and an absence of genetically distinguishable groups during the Bayesian cluster analyses. The lack of spatial genetic divergence observed can be explained by several non-exclusive hypotheses among which are high gene flow, historical genetic signal, and type II error. A detailed discussion on these three hypotheses is provided below.

Although this view has been largely challenged (Lundy *et al.*, 1999; Hoarau *et al.*, 2002; Pampoulie *et al.*, 2006; Charrier *et al.*, 2007; Was *et al.*, 2008), marine species have been thought to be genetically homogeneous owing to their ability to disperse as both eggs and larvae and adults (Waples, 1998). Adult Norway lobster are sedentary, occupying burrows between 10 and 1200 m deep and, according to tagging data, rarely move more than 100 m from their burrow (Chapman and Rice, 1971). Further, females carry the eggs under their tail and stay largely in their burrows until the larvae hatch, so only passive dispersal of larvae by local oceanic currents can explain the lack of genetic structure observed. In Icelandic waters, two main currents might promote larval dispersal in the south (Figure 1). A branch of the North Atlantic current flows towards the mid-south Icelandic coast, with the main warm water branching towards the southwest, and another branch turns east towards the southeast of the country. Closer to shore, the coastal current originates from the



southeast coast and flows clockwise around the island. Modelling the effect of these oceanic currents (particle-tracking) on the drift probabilities of Icelandic cod (*Gadus morhua*) larvae, Brickman et al. (2007) showed that larval drift in the south area of Iceland can be important within a 4–8-week pelagic period (see Figure 7 and 8 of Brickman et al., 2007). The dispersal of larvae has already been mentioned as a possible cause for the absence of genetic structure in crustacean species over vast distances (Sotelo et al., 2008; Ungfors et al., 2009).

An alternative hypothesis would be the presence of a historical signal in the genetic data. Recent microsatellite studies have demonstrated that the contemporary genetic patterns might have originated from the isolation of populations in glacial refugia during Pleistocene ice ages (Hardie et al., 2006; Hoarau et al., 2007; Pampoulie et al., 2008; Stefánsson et al., 2009b). In the area studied, the last glacial maximum (LGM) some 21 000 years ago was suggested to be one of the possible explanations for the observed genetic structure of commercial marine species such as cod (Pampoulie et al., 2008) and deep-sea redfish (Stefánsson et al., 2009b). During LGM, the northern part of the North Atlantic was covered with ice and average reconstructed temperatures ranged from  $-2$  to  $-4^{\circ}\text{C}$  (Siebert and Dowdeswell, 2004), conditions likely too extreme for Norway lobster. After the LGM, colonization of the newly opened environment from refuge areas probably resulted in a typical lack of mutation-drift equilibrium as a result of recent population expansion, and hence the lack of genetic differentiation. This phenomenon has already been suggested to explain the genetic pattern of *N. norvegicus* (Stamatis et al., 2004).

Finally, the lack of significant genetic differentiation is unlikely to result from a type II error, because the statistical test indicated that our genetic design should be able to detect any significant level of differentiation equal to or above  $F_{ST} = 0.0001$  with a power  $>99\%$  if it were present.

Although temporal approaches are proposed to ascertain the genetic structure of marine organisms owing to the generally low level of differentiation, this preliminary study has revealed that (i) the microsatellite loci employed are powerful enough to detect any significant differentiation, (ii) the *N. norvegicus* population is unlikely to be structured on the geographic scale investigated, but also that (iii) further analyses are needed to elucidate fully the structure of this species in Icelandic waters. Because of the low level of differentiation observed, future genetic investigation needs to be based on larger sample size, potentially more microsatellite loci (if available), and a temporal design. Sample collection might also be better during several months within a year to avoid a potentially biased sex ratio to assess its effect on the genetic pattern detected.

Norway lobster are currently managed as a single fishing unit in Icelandic waters, and although this preliminary study does not suggest any discrepancy between biological and fisheries management units, other biological parameters such as variability in cpue, mean size, and growth pattern might be taken into account for future management advice, as already stated (Anon., 2002).

## Acknowledgements

This research was supported by the Icelandic Fisheries Research Fund in Iceland (Stofnerfðafraeði leturhumars á Íslandsmiðum, Grant R013). We thank Stefán H. Brynjólfsson, Sæunn K. Erlingsdóttir, and G. Skúli Bragason for collecting the Icelandic samples, and Hasnita Charun and Douglas Neil for

providing the Scottish samples and commenting on an early draft of the manuscript. We also acknowledge A. K. Sigmarsdóttir and S. Magnúsdóttir for their laboratory work, and K. Kristinsson and J. Sólmundsson for providing Figure 1.

## References

- Anon. 2002. State of Marine Stocks in Icelandic Waters 2001/2002. Prospects for the Quota Year 2002/2003. Hafrannsóknastofnun Fjölrít, 88: 91–95.
- Brickman, D., Marteinsdóttir, G., Logemann, K., and Harms, I. H. 2007. Drift probabilities for Icelandic cod larvae. ICES Journal of Marine Science, 64: 49–59.
- Cadrin, S. X., Friedland, K. D., and Waldman, J. R. (Eds). 2005. Stock Identification Methods: Applications in Fishery Science. Elsevier Academic Press, Amsterdam. 719 pp.
- Chapman, C. J., and Rice, A. L. 1971. Some direct observations on the ecology and behaviour of the Norway lobster *Nephrops norvegicus*. Marine Biology, 10: 321–329.
- Charrier, G., Coombs, S. H., McQuinn, I. H., and Laroche, J. 2007. Genetic structure of whiting *Merlangius merlangus* in the Northeast Atlantic and adjacent waters. Marine Ecology Progress Series, 330: 201–211.
- D'Amato, M. E. 2006. Demographic expansion and subtle differentiation in the long-tailed hake *Macruronus magellanicus*: evidence from microsatellite data. Marine Biotechnology, 8: 189–201.
- Eiríksson, H. 1968. The effect of fishing on catch per effort, size and sex-ratio of the Norway lobster (*Nephrops norvegicus* L.) in Icelandic waters during the years 1962–1967. ICES Document CM 1968/K: 04.
- Eiríksson, H. 1970a. The *Nephrops* Fishery of Iceland 1958–1969. ICES Document CM 1970/K: 05.
- Eiríksson, H. 1970b. On the breeding cycle and fecundity of the Norway lobster at South-West Iceland. ICES Document CM 1970/K: 06.
- Eiríksson, H. 1999. Spatial variabilities of CPUE and mean size as possible criteria for unit stock demarcations in analytical assessments of *Nephrops* at Iceland. Rit Fiskideildar, 16: 239–245.
- Figueiredo, M. J., and Thomas, H. J. 1967. On the biology of the Norway lobster, *Nephrops norvegicus* (L.). Journal du Conseil Permanent International pour l'Exploration de la Mer, 31: 89–101.
- Fritsch, M., Morizur, Y., Lambert, E., Bonhomme, F., and Guinand, B. 2007. Assessment of sea bass (*Dicentrarchus labrax*, L.) stock delimitation in the Bay of Biscay and the English Channel based on mark-recapture and genetic data. Fisheries Research, 83: 123–132.
- Hardie, D. C., Gillet, R. M., and Hutchings, J. A. 2006. The effects of isolation and colonization history on the genetic structure of marine-relict populations of Atlantic cod (*Gadus morhua*) in the Canadian Arctic. Canadian Journal of Fisheries and Aquatic Sciences, 63: 1830–1839.
- Hoarau, G., Coyer, J. A., Veldsink, J. H., Stam, W. T., and Olsen, J. L. 2007. Glacial refugia and recolonization pathways in the brown seaweed *Fucus serratus*. Molecular Ecology, 16: 3606–3616.
- Hoarau, G., Rijnsdorp, A. D., Van Der Veer, H. W., Stam, W. T., and Olsen, J. L. 2002. Population structure of plaice (*Pleuronectes platessa* L.) in northern Europe: microsatellites revealed large-scale spatial and temporal homogeneity. Molecular Ecology, 11: 1165–1176.
- Hubisz, M. J., Falush, D., Stephens, M., and Pritchard, J. K. 2009. Inferring weak population structure with the assistance of sample group information. Molecular Ecology Resources, 9: 1322–1332.
- Jørgensen, H. B. H., Hansen, M. M., Bekkevold, D., Ruzzante, D. E., and Loeschcke, V. 2005. Marine landscapes and population genetic structure of herring (*Clupea harengus* L.) in the Baltic Sea. Molecular Ecology, 14: 3219–3234.
- Knutsen, H., Jorde, P. E., André, C., and Stenseth, N. Ch. 2003. Fine-scaled geographical population structuring in a highly

- mobile marine species: the Atlantic cod. *Molecular Ecology*, 12: 385–394.
- Lundy, C. J., Moran, P., Rico, C., Millner, R. S., and Hewitt, G. M. 1999. Macrogeographical population differentiation in oceanic environments: a case study of European hake (*Merluccius merluccius*), a commercially important fish. *Molecular Ecology*, 8: 1889–1898.
- Nei, M. 1987. *Molecular Evolutionary Genetics*. Columbia University Press, New York. 512 pp.
- Nielsen, E. E., Hansen, M. M., Ruzzante, D. E., Meldrup, D., and Gronkjaer, P. 2003. Evidence of a hybrid-zone in Atlantic cod (*Gadus morhua*) in the Baltic and the Danish Belt Sea revealed by individual admixture analysis. *Molecular Ecology*, 12: 1497–1508.
- Pampoulie, C., Gislason, D., and Daniëlsdóttir, A. K. 2009. A “seascape genetic” snapshot of *Sebastes marinus* calls for further investigation across the North Atlantic. *ICES Journal of Marine Science*, 66: 2219–2222.
- Pampoulie, C., Ruzzante, D. E., Chosson, V., Jörundsdóttir, T. D., Taylor, L., Thorsteinsson, V., Daniëlsdóttir, A. K., *et al.* 2006. The genetic structure of Atlantic cod (*Gadus morhua*) around Iceland: insight from microsatellites, the *Pan I* locus, and tagging experiments. *Canadian Journal of Fisheries and Aquatic Sciences*, 63: 2660–2674.
- Pampoulie, C., Stefánsson, M. Ö., Jörundsdóttir, T. D., Danilowicz, B. S., and Daniëlsdóttir, A. K. 2008. Recolonisation route and large scale dispersal in the open sea: the case study of the North Atlantic cod, *Gadus morhua* L. *Biological Journal of the Linnean Society*, 94: 315–329.
- Pritchard, J. K., Stephens, M., and Donnelly, P. 2000. Inference of population structure using multilocus genotype data. *Genetics*, 155: 945–959.
- Reiss, H., Hoarau, G., Dickey-Collas, M., and Wolff, W. J. 2009. Genetic population structure of marine fish: mismatch between biological and fisheries management units. *Fish and Fisheries*, 10: 361–395.
- Rice, W. R. 1989. Analyzing tables of statistical tests. *Evolution*, 43: 223–225.
- Rousset, F. 2008. GENEPOP’007: a complete re-implementation of the GENEPOP software for Windows and Linux. *Molecular Ecology Resources*, 8: 103–106.
- Ryman, N., and Palm, S. 2006. POWSIM: a computer program for assessing statistical power when testing for genetic differentiation. *Molecular Ecology*, 6: 600–602.
- Siebert, M. J., and Dowdeswell, J. A. 2004. Numerical reconstructions of the Eurasian ice sheet and climate during the late Weichselian. *Quaternary Science Reviews*, 23: 1273–1283.
- Skirnisdóttir, S., Olafsson, K., Hauksdóttir, S., Pampoulie, C., Hreggvidsson, G. O., Gunnarsson, G. H., and Hjorleifsdóttir, S. 2010. Isolation and characterisation of eight new microsatellite loci in the Norway lobster, *Nephrops norvegicus* (Linnaeus, 1758). *Molecular Ecology Resources Database*, <http://tomato.bio.trinity.edu/manuscripts/10-4/mer-10-0048.pdf> (accessed 26 October 2010).
- Sotelo, G., Morán, P., Fernández, L., and Posada, D. 2008. Genetic variation of the spiny spider crab *Maja brachydactyla* in the Northeastern Atlantic. *Marine Ecology Progress Series*, 362: 211–223.
- Stamatis, C., Triantafyllidis, A., Moutou, K. A., and Mamuris, Z. 2004. Mitochondrial DNA variation in Northeast Atlantic and Mediterranean populations of Norway lobster, *Nephrops norvegicus*. *Molecular Ecology*, 13: 1377–1390.
- Stefánsson, M. Ö., Reinert, J., Sigurðsson, T., Kristinsson, K., Nedreaas, K., and Pampoulie, C. 2009a. Depth as a potential driver of genetic structure of *Sebastes mentella* across the North Atlantic Ocean. *ICES Journal of Marine Science*, 66: 680–690.
- Stefánsson, M. Ö., Sigurðsson, T., Pampoulie, C., Daniëlsdóttir, A. K., Thorgilsson, B., Ragnarsdóttir, A., Coughlan, J., *et al.* 2009b. Pleistocene genetic legacy suggests incipient species of *Sebastes mentella* within the Irminger Sea. *Heredity*, 102: 514–524.
- Streiff, R., Guillemaud, T., Alberto, F., Magalhaes, J., Castro, M., and Cancela, M. L. 2001. Isolation and characterization of microsatellite loci on the Norway lobster (*Nephrops norvegicus*). *Molecular Ecology Notes*, 1: 71–72.
- Ungfors, A., Mckeown, N. J., Shaw, P. W., and André, C. 2009. Lack of spatial genetic variation in the edible crab (*Cancer pagurus*) in the Kattegat–Skagerrak area. *ICES Journal of Marine Science*, 66: 462–469.
- Viñas, J., Alvarado Bremer, J. R., and Pla, C. 2004. Inter-oceanic genetic differentiation among albacore (*Thunnus alalunga*) populations. *Marine Biology*, 145: 225–232.
- Waples, R. S. 1998. Separating the wheat from the chaff: patterns of genetic differentiation in high gene flow species. *The Journal of Heredity*, 89: 438–450.
- Was, A., Gosling, E., McCrann, K., and Mork, J. 2008. Evidence for population structuring of blue whiting (*Micromesistius poutassou*) in the Northeast Atlantic. *ICES Journal of Marine Science*, 65: 216–225.
- Weir, B. S., and Cockerham, C. C. 1984. Estimating *F*-statistics for the analysis of population structure. *Evolution*, 38: 1358–1370.
